# Supplementary material for: Using Normalization Process Theory in feasibility studies and process evaluations of complex healthcare interventions: a systematic review
Source: PubMed Central journal article supplement (PMC5992634; doi:10.1186/s13012-018-0758-1), 2018-06-07
Supplement: 13012_2018_758_MOESM1_ESM.pdf [file 13012_2018_758_MOESM1_ESM.pdf]

# NPT systematic review

Data extraction instrument: The uses and limitations of theory in Implementation Research: a systematic review of Normalization Process Theory applied to complex healthcare processes and interventions

## 1. Reviewer

- AC
- TF
- MG
- FM
- CM
- EM
- MM
- TR

## 2. Full citation

## 3. What iteration of the theory is used?

Tick all that apply

- NPM (May 2006)
- NPT (May & Finch 2009)
- eNPT (May 2013)
- Not clear

Selected constructs (please detail)

## 4. Country of origin

- England
- UK
- Ireland
- Netherlands
- US
- Canada
- Australia
- Germany
- South Africa

Other (please specify)

## 5. Study setting

- Community / Population
- Nursing Home / Residential Care
- Primary Care / General Practice
- Hospital / Secondary Care

Other (please specify)

## 6. Study type

- Development of an intervention
- Optimisation of an intervention, including formative evaluation of e.g. acceptability and feasibility
- Evaluation of effectiveness, through e.g. RCT or other method (to be described)
- Implementation of an intervention, to find out what the impact of the intervention is in routine use
- Implementation of an intervention, to find out how to get the intervention into routine use

Other (please specify)

## 7. Intervention type

- Diagnostics/Therapeutics
- Decision support/shared decision-making tool
- Screening/Surveillance
- Guideline/Evidence implementation
- New professional roles
- New patient/service user roles
- Informatics/Telemedicine/EHRs
- Organization/Delivery of care/pathway
- Policy change

Other (please specify)

## 8. Which is the PRIMARY intervention (if more than one)?

## 9. Sample selection

- Structured
- Purposive
- Convenience
- Not described
- Not clear

Other (details)

## 10. Sample size

- Unknown

N =

## 11. Study duration

- Not described

Described n= months



## 12. Sample composition

- Policy-makers
- Managers
- Professionals
- Patients/service users
- Not described

Other (please specify)

## 13. Method of data collection

- Qualitative interviews
- Qualitative observation
- Qualitative interviews + observation
- Documentary analysis
- Survey interviews
- Online or postal survey
- Mixed methods
- Other quantitative method
- Audit of routinely collected clinical data

Other (please specify)

## 14. If MIXED METHODS, please specify

## 15. How was NPT used?

- Prospectively, to inform research questions and study design
- Retrospectively, to analyse data already collected (framework or similar analysis)
- Retrospectively, to interpret data analysed by other means (e.g emergent or 'thematic' coding)

Other (please specify)

**16. Was the NPT Toolkit used to provide a framework for data collection and analysis?**

Yes

No

**17. Do the authors provide a rationale for using NPT?**

yes

No

Details

**18. Do the authors discuss other NPT studies?**

Yes

No

Details

**19. Do the authors compare NPT with other theories?**

Yes

No

Details

**20. Do the authors identify limits or problems associated with NPT?**

Yes

No

Details

**21. Does the paper explicitly discuss NPM/NPT/eNPT constructs?**

Yes

No

List constructs here:

**22. What is NPT used to explain?**

**23. What explanations are offered?**

**24. What are the overall conclusions of the paper?**
